# Supplementary material for: Determining subunit-subunit interaction from statistics of cryo-EM images: observation of nearest-neighbor coupling in a circadian clock protein complex
Source: Nat Commun. 2023 Sep 22;14:5907. doi: 10.1038/s41467-023-41575-1 (PMC10516925; doi:10.1038/s41467-023-41575-1)
Supplement: Supplementary file 4 — Source Data [file 41467_2023_41575_MOESM4_ESM.xlsx]

## Sheet: Fig. 3a
Source data of Fig. 3a:
Hexamer conformation patterns	Probability
1	0.10136
2	0.2158
3	0.13251
4	0.08333
5	0.04101
6	0.09196
7	0.11101
8	0.01167
9	0.02083
10	0.04092
11	0.07203
12	0.06015
13	0.01741

## Sheet: Fig. 3b
Source data of Fig. 3b:
Hexamer conformation patterns	Probability
1	0.00682
2	0.03687
3	0.05337
4	0.03517
5	0.01824
6	0.08423
7	0.1075
8	0.01175
9	0.04352
10	0.08851
11	0.14305
12	0.24947
13	0.12151

## Sheet:  Fig. 3c
Source data of Fig. 3c:
average:
x	0	1	2	3
C(x)	1	0.130328	0.0355222	0.0256446
AA experiment:
x	0	1	2	3
C(x)	1	0.117797	0.0278888	0.0179285
EE experiment:
x	0	1	2	3
C(x)	1	0.164106	0.0560023	0.046312
fitting
x	C(x)
0	1.00001
0.0323232	0.937805
0.0646465	0.879473
0.0969697	0.824769
0.129293	0.773468
0.161616	0.725358
0.193939	0.680241
0.226263	0.63793
0.258586	0.598251
0.290909	0.56104
0.323232	0.526144
0.355556	0.493418
0.387879	0.462728
0.420202	0.433948
0.452525	0.406957
0.484848	0.381646
0.517172	0.357909
0.549495	0.335649
0.581818	0.314774
0.614141	0.295197
0.646465	0.276838
0.678788	0.259621
0.711111	0.243476
0.743434	0.228334
0.775758	0.214135
0.808081	0.20082
0.840404	0.188333
0.872727	0.176623
0.905051	0.165641
0.937374	0.155343
0.969697	0.145686
1.00202	0.13663
1.03434	0.128138
1.06667	0.120174
1.09899	0.112706
1.13131	0.105703
1.16364	0.0991362
1.19596	0.0929784
1.22828	0.0872042
1.26061	0.0817897
1.29293	0.0767127
1.32525	0.0719522
1.35758	0.0674885
1.3899	0.0633033
1.42222	0.0593793
1.45455	0.0557002
1.48687	0.0522509
1.51919	0.0490172
1.55152	0.0459857
1.58384	0.043144
1.61616	0.0404802
1.64848	0.0379835
1.68081	0.0356434
1.71313	0.0334505
1.74545	0.0313955
1.77778	0.02947
1.8101	0.0276662
1.84242	0.0259765
1.87475	0.0243939
1.90707	0.022912
1.93939	0.0215246
1.97172	0.020226
2.00404	0.0190109
2.03636	0.0178742
2.06869	0.0168113
2.10101	0.0158177
2.13333	0.0148893
2.16566	0.0140224
2.19798	0.0132134
2.2303	0.0124588
2.26263	0.0117557
2.29495	0.0111011
2.32727	0.0104922
2.3596	0.00992666
2.39192	0.00940207
2.42424	0.00891626
2.45657	0.00846724
2.48889	0.00805315
2.52121	0.00767228
2.55354	0.00732307
2.58586	0.00700408
2.61818	0.00671397
2.65051	0.00645157
2.68283	0.00621579
2.71515	0.00600565
2.74747	0.00582029
2.7798	0.00565894
2.81212	0.00552093
2.84444	0.00540571
2.87677	0.00531279
2.90909	0.00524178
2.94141	0.00519241
2.97374	0.00516445
3.00606	0.0051578
3.03838	0.00517243
3.07071	0.0052084
3.10303	0.00526586
3.13535	0.00534505
3.16768	0.00544628
3.2	0.00556999

## Sheet: Fig. 3d (left)
Source data of Fig. 3d (left):
Probability from experiments	Probability from model
0.10136	0.0931
0.2158	0.21733
0.13251	0.14862
0.08333	0.08455
0.04101	0.04228
0.09196	0.10164
0.11101	0.11565
0.01167	0.01097
0.02083	0.01977
0.04092	0.03954
0.07203	0.06951
0.06015	0.04753
0.01741	0.00952

## Sheet: Fig. 3d (right)
Source data of Fig. 3d (right):
Probability from experiments	Probability from model
0.00682	0.006
0.03687	0.03378
0.05337	0.0557
0.03517	0.03169
0.01824	0.01584
0.08423	0.09183
0.1075	0.10449
0.01175	0.00991
0.04352	0.04307
0.08851	0.08613
0.14305	0.1514
0.24947	0.24961
0.12151	0.12056

## Sheet: Fig. 3e
Source data of Fig. 3e:
J
-0.02	0.80664
-0.019	0.8089
-0.018	0.81113
-0.017	0.81333
-0.016	0.81551
-0.015	0.81766
-0.014	0.81978
-0.013	0.82188
-0.012	0.82396
-0.011	0.82602
-0.01	0.82812
-0.009	0.8302
-0.008	0.83231
-0.007	0.83441
-0.006	0.83648
-0.005	0.83853
-0.004	0.84055
-0.003	0.84255
-0.002	0.84452
-0.001	0.84646
0	0.84839
0.001	0.85037
0.002	0.85232
0.003	0.85425
0.004	0.85619
0.005	0.85813
0.006	0.86005
0.007	0.86194
0.008	0.86381
0.009	0.86565
0.01	0.86747
0.011	0.86926
0.012	0.87109
0.013	0.87291
0.014	0.87471
0.015	0.87648
0.016	0.87823
0.017	0.88001
0.018	0.88178
0.019	0.88352
0.02	0.88523
0.021	0.88692
0.022	0.88858
0.023	0.89022
0.024	0.89192
0.025	0.89359
0.026	0.89524
0.027	0.89686
0.028	0.89845
0.029	0.90002
0.03	0.90161
0.031	0.90319
0.032	0.90476
0.033	0.90629
0.034	0.90781
0.035	0.90929
0.036	0.91083
0.037	0.91235
0.038	0.91385
0.039	0.91532
0.04	0.91677
0.041	0.91819
0.042	0.91958
0.043	0.92095
0.044	0.92233
0.045	0.92372
0.046	0.92509
0.047	0.92642
0.048	0.92777
0.049	0.92914
0.05	0.93049
0.051	0.93181
0.052	0.93311
0.053	0.93439
0.054	0.93563
0.055	0.93686
0.056	0.93806
0.057	0.93923
0.058	0.94038
0.059	0.94155
0.06	0.94272
0.061	0.94389
0.062	0.94509
0.063	0.94627
0.064	0.94742
0.065	0.94855
0.066	0.94966
0.067	0.95074
0.068	0.95179
0.069	0.95282
0.07	0.95382
0.071	0.95481
0.072	0.95576
0.073	0.95669
0.074	0.9576
0.075	0.95862
0.076	0.95963
0.077	0.96062
0.078	0.96158
0.079	0.96252
0.08	0.96343
0.081	0.96432
0.082	0.96519
0.083	0.96603
0.084	0.96684
0.085	0.96763
0.086	0.9684
0.087	0.96914
0.088	0.96986
0.089	0.97062
0.09	0.97138
0.091	0.97214
0.092	0.97291
0.093	0.97366
0.094	0.97439
0.095	0.97509
0.096	0.97577
0.097	0.97642
0.098	0.97705
0.099	0.97766
0.1	0.97824
0.101	0.9788
0.102	0.97933
0.103	0.97987
0.104	0.98044
0.105	0.98099
0.106	0.98152
0.107	0.98202
0.108	0.98249
0.109	0.98299
0.11	0.98349
0.111	0.98396
0.112	0.98441
0.113	0.98484
0.114	0.98524
0.115	0.98562
0.116	0.98597
0.117	0.9863
0.118	0.98662
0.119	0.98699
0.12	0.98734
0.121	0.98766
0.122	0.98796
0.123	0.98824
0.124	0.9885
0.125	0.98873
0.126	0.98893
0.127	0.98912
0.128	0.98933
0.129	0.98953
0.13	0.98971
0.131	0.98987
0.132	0.99
0.133	0.99011
0.134	0.99023
0.135	0.99039
0.136	0.99052
0.137	0.99062
0.138	0.99071
0.139	0.99077
0.14	0.9908
0.141	0.99082
0.142	0.99081
0.143	0.99077
0.144	0.99072
0.145	0.99064
0.146	0.99054
0.147	0.99041
0.148	0.9903
0.149	0.9902
0.15	0.99009
0.151	0.99003
0.152	0.98994
0.153	0.98984
0.154	0.98971
0.155	0.98956
0.156	0.98939
0.157	0.98919
0.158	0.98898
0.159	0.98874
0.16	0.98847
0.161	0.98818
0.162	0.98787
0.163	0.98754
0.164	0.98719
0.165	0.98681
0.166	0.98641
0.167	0.98601
0.168	0.98565
0.169	0.98529
0.17	0.98496
0.171	0.98461
0.172	0.98423
0.173	0.98383
0.174	0.98341
0.175	0.98297
0.176	0.98251
0.177	0.98202
0.178	0.98151
0.179	0.98098
0.18	0.98042
0.181	0.97985
0.182	0.97925
0.183	0.97862
0.184	0.97798
0.185	0.97738
0.186	0.97679
0.187	0.97617
0.188	0.97553
0.189	0.97487
0.19	0.97419
0.191	0.97348
0.192	0.9728
0.193	0.97212
0.194	0.97141
0.195	0.97069
0.196	0.96994
0.197	0.96918
0.198	0.96839
0.199	0.96757
0.2	0.96674
0.201	0.96588
0.202	0.965
0.203	0.96417
0.204	0.96335
0.205	0.9625
0.206	0.96163
0.207	0.96074
0.208	0.95982
0.209	0.95889
0.21	0.95793
0.211	0.95695
0.212	0.95595
0.213	0.95492
0.214	0.95388
0.215	0.95281
0.216	0.95178
0.217	0.95074
0.218	0.94968
0.219	0.94859
0.22	0.94749
0.221	0.94638
0.222	0.94533
0.223	0.94426
0.224	0.94317
0.225	0.94206
0.226	0.94093
0.227	0.93977
0.228	0.93859
0.229	0.93739
0.23	0.93617
0.231	0.93493
0.232	0.93366
0.233	0.93237
0.234	0.93106
0.235	0.92973
0.236	0.92838
0.237	0.927
0.238	0.9256
0.239	0.92418
0.24	0.92275
0.241	0.92147
0.242	0.92017
0.243	0.91884
0.244	0.9175
0.245	0.91613
0.246	0.91474
0.247	0.91333
0.248	0.9119
0.249	0.91045
0.25	0.90897
0.251	0.90747
0.252	0.90595
0.253	0.90441
0.254	0.90284
0.255	0.90126
0.256	0.89965
0.257	0.89802
0.258	0.89636
0.259	0.89469
0.26	0.89306
0.261	0.89145
0.262	0.88982
0.263	0.88817
0.264	0.88649
0.265	0.8848
0.266	0.88311
0.267	0.88146
0.268	0.87978
0.269	0.87808
0.27	0.87636
0.271	0.87462
0.272	0.87285
0.273	0.87106
0.274	0.86925
0.275	0.86742
0.276	0.86557
0.277	0.86369
0.278	0.86179
0.279	0.85987
0.28	0.858
0.281	0.85615
0.282	0.85428
0.283	0.85239
0.284	0.85048
0.285	0.84854
0.286	0.84658
0.287	0.84461
0.288	0.8426
0.289	0.84058
0.29	0.83853
0.291	0.83646
0.292	0.83437
0.293	0.83233
0.294	0.83029
0.295	0.82822
0.296	0.82613
0.297	0.82401
0.298	0.82187
0.299	0.81972
0.3	0.81755
0.301	0.81547
0.302	0.81337
0.303	0.81125
0.304	0.8091
0.305	0.80694
0.306	0.80475
0.307	0.80254
0.308	0.8003
0.309	0.79804
0.31	0.79576

## Sheet: Fig. 4a
Source data of Fig. 4a:
Hexamer conformation patterns	Probability
1	0.01224
2	0.0628
3	0.08259
4	0.0557
5	0.02775
6	0.0984
7	0.14357
8	0.01742
9	0.04683
10	0.09291
11	0.12675
12	0.17368
13	0.05937

## Sheet: Fig. 4b
Source data of Fig. 4b:
experiment
x	0	1	2	3
C(x)	1	0.0821609	0.0136365	0.00938682
fitting
x	C(x)
0	1
0.030303	0.927551
0.0606061	0.860351
0.0909091	0.798019
0.121212	0.740204
0.151515	0.686577
0.181818	0.636835
0.212121	0.590697
0.242424	0.547902
0.272727	0.508207
0.30303	0.471388
0.333333	0.437236
0.363636	0.405559
0.393939	0.376177
0.424242	0.348923
0.454545	0.323644
0.484848	0.300197
0.515152	0.278448
0.545455	0.258275
0.575758	0.239563
0.606061	0.222207
0.636364	0.206109
0.666667	0.191177
0.69697	0.177326
0.727273	0.16448
0.757576	0.152563
0.787879	0.141511
0.818182	0.131259
0.848485	0.12175
0.878788	0.112929
0.909091	0.104748
0.939394	0.0971598
0.969697	0.0901212
1	0.0835926
1.0303	0.077537
1.06061	0.0719202
1.09091	0.0667103
1.12121	0.061878
1.15152	0.0573958
1.18182	0.0532384
1.21212	0.0493823
1.24242	0.0458057
1.27273	0.0424882
1.30303	0.0394112
1.33333	0.0365572
1.36364	0.0339101
1.39394	0.0314548
1.42424	0.0291776
1.45455	0.0270655
1.48485	0.0251065
1.51515	0.0232896
1.54545	0.0216045
1.57576	0.0200416
1.60606	0.0185922
1.63636	0.017248
1.66667	0.0160014
1.69697	0.0148453
1.72727	0.0137732
1.75758	0.0127791
1.78788	0.0118573
1.81818	0.0110026
1.84848	0.0102102
1.87879	0.00947548
1.90909	0.00879443
1.93939	0.00816315
1.9697	0.00757806
2	0.00703585
2.0303	0.00653346
2.06061	0.00606804
2.09091	0.00563696
2.12121	0.00523778
2.15152	0.00486824
2.18182	0.00452624
2.21212	0.00420986
2.24242	0.00391731
2.27273	0.00364692
2.30303	0.00339716
2.33333	0.00316663
2.36364	0.00295402
2.39394	0.00275813
2.42424	0.00257785
2.45455	0.00241215
2.48485	0.0022601
2.51515	0.00212084
2.54545	0.00199359
2.57576	0.00187761
2.60606	0.00177226
2.63636	0.00167694
2.66667	0.00159111
2.69697	0.00151428
2.72727	0.00144602
2.75758	0.00138595
2.78788	0.00133371
2.81818	0.00128903
2.84848	0.00125163
2.87879	0.00122133
2.90909	0.00119793
2.93939	0.00118131
2.9697	0.00117138
3	0.00116807

## Sheet: Fig. 4c
Source data of Fig. 4c:
Probability from experiments	Probability from model
0.01224	0.05409
0.0628	0.12634
0.08259	0.09294
0.0557	0.05925
0.02775	0.02962
0.0984	0.08809
0.14357	0.10926
0.01742	0.01171
0.04683	0.03218
0.09291	0.06472
0.12675	0.10754
0.17368	0.15481
0.05937	0.06946

## Sheet: Fig. 4d
Source data of Fig. 4d:
Probability from experiments	Probability from model
0.01224	0.02883
0.0628	0.10425
0.08259	0.11032
0.0557	0.06283
0.02775	0.03142
0.0984	0.11672
0.14357	0.13297
0.01742	0.01262
0.04683	0.03517
0.09291	0.07033
0.12675	0.12349
0.17368	0.13063
0.05937	0.04043

[truncated: 25 more sheets: Fig. 4e, Suppl. Fig. 1d, Suppl. Fig. 1h, Suppl. Fig. 5a, Suppl. Fig. 5c, Suppl. Fig. 7a, Suppl. Fig. 7c, Suppl. Fig. 8a, Suppl. Fig. 8b, Suppl. Fig. 9c, Suppl. Fig. 10a, Suppl. Fig. 12a, Suppl. Fig. 12b, Suppl. Fig. 12c, Suppl. Fig. 12e, Suppl. Fig. 12g, Suppl. Fig. 12i, Suppl. Fig. 13, Suppl. Fig. 14a, Suppl. Fig. 14b …]
